# Supplementary material
Source: PubMed Central journal article supplement (PMC3438945)

## SUPPLEMENTARY FIGURE LEGENDS

**Figure S1. Representative immunoblots of RNAi-mediated silencing efficiency for Arf6 and BRAG2.** HeLa cells were treated with siRNAs as indicated and lysates were probed with antibody to BRAG2 (top) or Arf6 (bottom) to demonstrate silencing efficiency of experiments in Figure 2.

**Figure S2. BRAG2 depletion affects activation of endogenous Arf6.** HeLa cells were either mock-depleted or depleted of BRAG2 with two different siRNAs. Lysates were precipitated with GST-GGA3 to measure activation of endogenous Arf1 and Arf6. Values are normalized to mock-depleted controls (t-test denotes \* n=3, p<0.05).

**Figure S3. Effects of BRAG2 depletion on expression of endogenous Arfs.** (A) Lysates from HeLa cells treated with siBRAG2-1 or siBRAG2-2 were resolved by SDS-PAGE and probed with anti-Arf1, a pan-Arf antibody (1D9), or anti-Arf6 antibodies to detect total Arf expression. (B) Densitometry was used to quantify the amount of Arf normalized to control for each siRNA condition (t-test denotes \* n=4, p<0.05).

**Figure S4. BRAG2 activates Arf4, but Arf4 does not regulate integrin internalization.** Arf4-GFP was co-transfected with either empty vector or HA-BRAG2b into COS-7 cells. (A) Lysates were incubated with GST-GGA3 to precipitate Arf4-GTP and precipitates were probed using an antibody to GFP (B) Quantitation of Arf4 activation (\* n=7 p<0.05 +/-SEM). (C) Internalization of  $\beta$ 1 integrin antibody by cells treated with control (non-target), Arf4, or Arf5 siRNAs, was measured using the flow cytometry assay as described in Fig. 4. (D) The amount of  $\beta$ 1 integrin antibody bound to the cell surface at time 0 (prior to internalization) was measured by flow cytometry. (t-test denotes \* n=3, p<0.05).

**Figure S5. BRAG2b colocalization with endogenous AP-2.** (A-C) HeLa cells were transfected with BRAG2b-GFP (A), fixed, and immunostained with an antibody to AP-2 (B). Fixed cells were then imaged by TIR-FM. (D-F) Control cells expressing unfused GFP show diffuse staining with no concentration at clathrin-coated structures.

Figure S1-S3

S1.

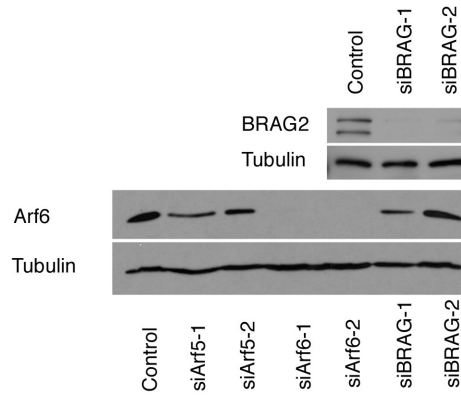

S2.

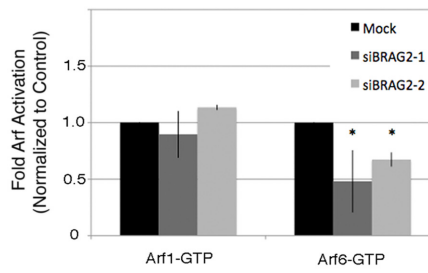

S3A.

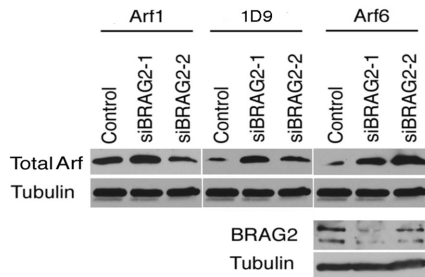

S3B.

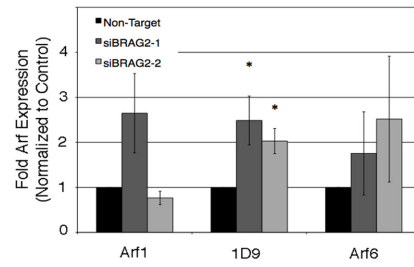

Figure S4

S4A.

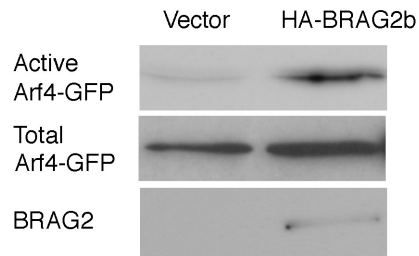

S4B.

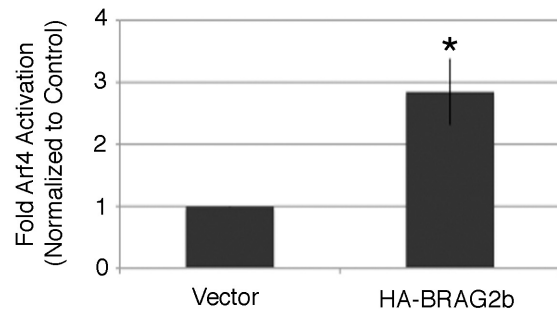

S4C.

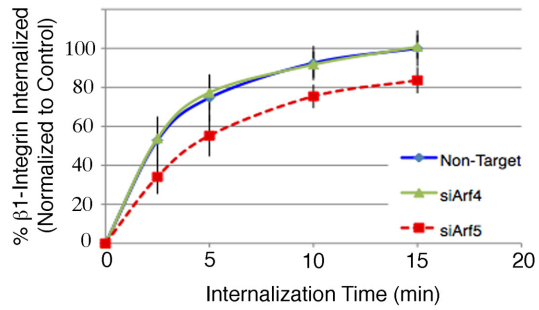

S4D.

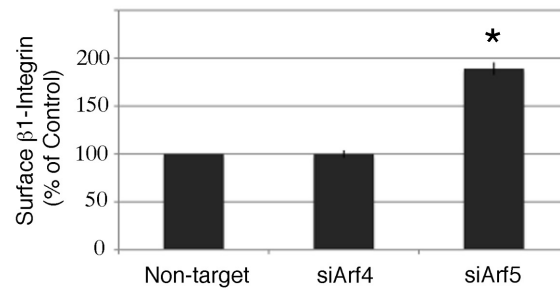

Figure S5

S5A-F

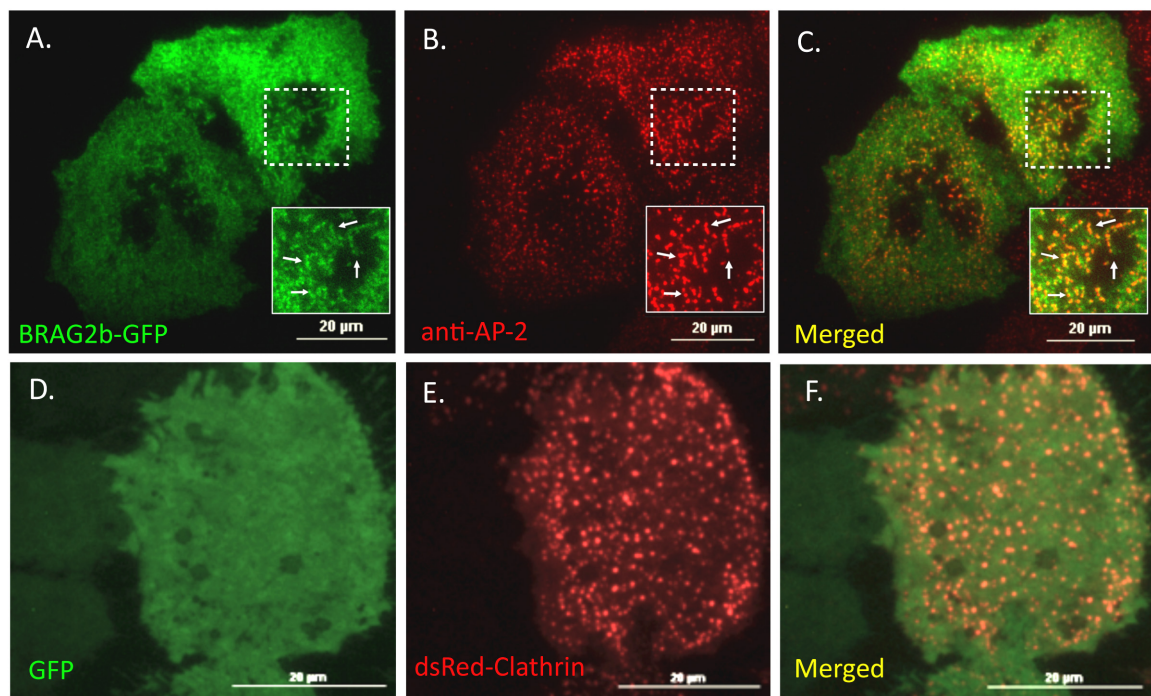

Supplement: supp_M112.383117_jbc.M112.383117-1.pdf [file supp_M112.383117_jbc.M112.383117-1.pdf]
